# Supplementary material for: CDK4/6-inhibiting drug substitutes for p21 and p16 in senescence: Duration of cell cycle arrest and MTOR activity determine geroconversion
Source: PubMed Central journal article supplement — Cell Cycle. 2013 Aug 22;12(18):3063–9. doi: 10.4161/cc.26130 (PMC3875680; doi:10.4161/cc.26130), 2013-08-22
Supplement: cc-12-3063-s01.pdf [file cc-12-3063-s01.pdf]

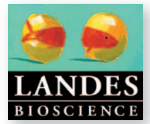

## **Supplemental Material to:**

**Olga V Leontieva and Mikhail V Blagosklonny**

**CDK4/6-inhibiting drug substitutes for p21 and p16 in senescence: Duration of cell cycle arrest and MTOR activity determine geroconversion**

**Cell Cycle 2013; 12(18)**

**<http://dx.doi.org/10.4161/cc.26130>**

**<http://www.landesbioscience.com/journals/cc/article/26130>**

A.

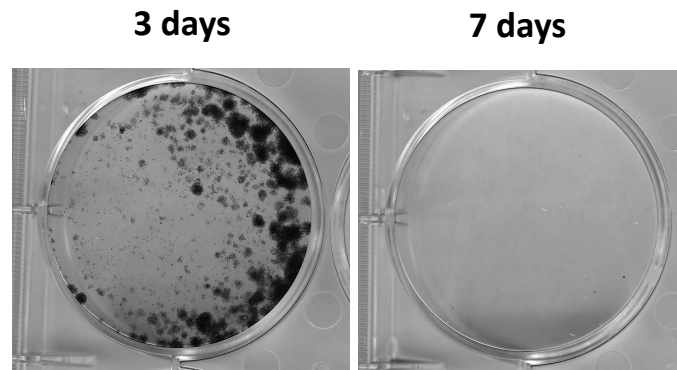

B.

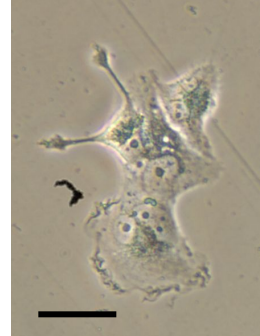

**Supplemental figure S1.**

**A. HT-p21 cells were treated with 0.5  $\mu$ M PD0332991 for 3 and 7 days, then drugs were washed out and cells were allowed to recover for 7 days and stained with crystal violet.**

**B. HT-p21 cells were treated with 0.5  $\mu$ M PD0332991 for 7 days and stained for beta-gal. Bar – 100  $\mu$ m.**
